# Supplementary material for: Association of l-Arginine Supplementation with Markers of Endothelial Function in Patients with Cardiovascular or Metabolic Disorders: A Systematic Review and Meta-Analysis
Source: PubMed Central journal article supplement (PMC6357192; doi:10.3390/nu11010015), 2018-12-20
Supplement: nutrients-11-00015-s001.pdf [file nutrients-11-00015-s001.pdf]

**Table S1.** Full text articles and reasons of exclusion in the metanalysis

| Reference                                                                                                                                                                                                                                                                                     | Status   | Reason of Exclusion |
|-----------------------------------------------------------------------------------------------------------------------------------------------------------------------------------------------------------------------------------------------------------------------------------------------|----------|---------------------|
| Schneider et al. Effects of chronic oral L-arginine administration on the L-arginine/NO pathway in patients with peripheral arterial occlusive disease or coronary artery disease:L-Arginine prevents renal loss of nitrite, the major NO reservoir. <i>Amino Acids</i> . 2015,47(9):1961-74. | Included | --                  |
| Bogdanski et al. Supplementation with L-arginine favorably influences plasminogen activator inhibitor type 1 concentration in obese patients. A randomized, double blind trial. <i>J Endocrinol Invest</i> . 2013. 36(4): 221-6.                                                              | Included | --                  |
| Monti et al . Effect of a long-term oral l-arginine supplementation on glucose metabolism: a randomized, double-blind, placebo-controlled trial. <i>Diabetes Obes Metab</i> . 2012, 14(10):893-900.                                                                                           | Included | --                  |
| Alizadeh et al. Effect of L-arginine and selenium added to a hypocaloric diet enriched with legumes on cardiovascular disease risk factors in women with central obesity: a randomized, double-blind, placebo-controlled trial. <i>Ann Nutr Metab</i> . 2012. 60(2): 157-68                   | Included | --                  |
| Jahangir et al. The effect of L-arginine and creatine on vascular function and homocysteine metabolism. <i>Vasc Med</i> . 2009, 14(3):239-48.                                                                                                                                                 | Included | --                  |
| Lucotti et al. Oral L-arginine supplementation improves endothelial function and ameliorates insulin sensitivity and inflammation in cardiopathic nondiabetic patients after an aortocoronary bypass. <i>Metabolism</i> . 2009, 58(9):1270-6                                                  | Included | --                  |
| Martina et al. Long-term N-acetylcysteine and L-arginine administration reduces endothelial activation and systolic blood pressure in hypertensive patients with type 2 diabetes. <i>Diabetes Care</i> . 2008, 31(5):940-4.                                                                   | Included | --                  |
| Wilson et al. <i>Circulation</i> . L-Arginine Supplementation in Peripheral Arterial Disease: No Benefit and Possible Harmful. 2007. 10;116(2):188-95.                                                                                                                                        | Included | --                  |
| Maxwell et al. 2002. Randomized trial of a medical food for the dietary management of chronic, stable angina. <i>J Am Coll Cardiol</i> .Jan 2;39(1):37-45                                                                                                                                     | Included | --                  |
| Walker et al. Endothelium-dependent vasodilation is independent of the plasma L-arginine/ADMA ratio in men with stable angina: lack of effect of oral L-arginine on endothelial function, oxidative stress and exercise performance. <i>J Am Coll Cardiol</i> . 2001, 38(2): 499-505.         | Included | --                  |
| Blum et al. Oral L-arginine in patients with coronary artery disease on medical management. <i>Circulation</i> . 2000, 101(18): 2160-4.                                                                                                                                                       | Included | -                   |
| Adams et al. Oral L-arginine improves endothelium-dependent dilatation and reduces monocyte adhesion to endothelial cells in young men with coronary artery disease. <i>Atherosclerosis</i> . 1997, 129(2):261-9.                                                                             | Included | --                  |

|                                                                                                                                                                                                                                                                                       |          |                                                    |
|---------------------------------------------------------------------------------------------------------------------------------------------------------------------------------------------------------------------------------------------------------------------------------------|----------|----------------------------------------------------|
| Rector et al. Randomized, double-blind, placebo-controlled study of supplemental oral L-arginine in patients with heart failure. <i>Circulation</i> . 1996, 93(12):2135-41.                                                                                                           | Included | --                                                 |
| Bahram et al. Effect of l-arginine and selenium on metabolic features, insulin resistance and hepatic function tests in obese women. <i>Current Nutrition &amp; Food Science</i> . 2016; 11(2): 93-98.                                                                                | Excluded | Criterion of obesity other than the eligible (BMI) |
| Deveaux et al. L-Arginine supplementation alleviates postprandial endothelial dysfunction when baseline fasting plasma arginine concentration is low: a randomized controlled trial in healthy overweight adults with cardiometabolic risk factors. <i>J Nutr</i> . 2016;146:1330–40. | Excluded | Without eligible population                        |
| Kayacelebi et al. Biosynthesis of homoarginine (hArg) and asymmetric dimethylarginine (ADMA) from acutely and chronically administered free L-arginine in humans. <i>Amino Acids</i> . 2015. 47(9):1893-908.                                                                          | Excluded | Study in duplicate (Schneider et al., 2015)        |
| Dashtabi et al. Oral L-Arginine administration improves anthropometric and biochemical indices associated with cardiovascular diseases in obese patients: a randomized, single blind placebo controlled clinical trial. <i>Res Cardiovasc Med</i> .2015,5(1): 294-319                 | Excluded | Without eligible outcome                           |
| Nascimento et al.ESPEN Journal. Effects of short-term l-arginine supplementation on lipid profile and inflammatory proteins after acute resistance exercise in overweight men. 2014, 9(3): 141– 145                                                                                   | Excluded | Without eligible population and outcome            |
| Suliburska et al. Changes in mineral status are associated with improvements in insulin sensitivity in obese patients following L-arginine supplementation. <i>Eur J Nutr</i> .2014, 53(2):387-93.                                                                                    | Included | Without eligible outcome                           |
| Monti et al. L-arginine enriched biscuits improve endothelial function and glucose metabolism: a pilot study in healthy subjects and a cross-over study in subjects with impaired glucose tolerance and metabolic syndrome. <i>Metabolism</i> . 2013, 62(2): 255-64.                  | Included | Without eligible type of intervention              |
| Bogdanski et al. Effect of 3-month L-arginine supplementation on insulin resistance and tumor necrosis factor activity in patients with visceral obesity. <i>Eur Rev Med Pharmacol Sci</i> . 2012, 16(6): 816-23.                                                                     | Included | Without eligible outcome                           |
| Figuroa et al. Effects of watermelon supplementation on arterial stiffness and wave reflection amplitude in postmenopausal women. <i>Menopause</i> . 2013. 20(5): 573-7.                                                                                                              | Excluded | Without eligible intervention                      |
| Tripathi et al. Role of L-Arginine on dyslipidemic Conditions of Acute Myocardial Infarction Patients. <i>Indian J Clin Biochem</i> . 2012, 27(3): 296-9.                                                                                                                             | Excluded | Without eligible design of study                   |
| Jabłocka et al. The effect of oral L-arginine supplementation on fasting glucose, HbA1c, nitric oxide and total antioxidant status in diabetic patients with atherosclerotic peripheral arterial disease of lower extremities. <i>Eur Rev Med Pharmacol Sci</i> . 2012, 16(3): 342-50 | Excluded | Without eligible comparator                        |
| Jude et al. Effect of L-arginine on the microcirculation in the neuropathic diabetic foot in Type 2 diabetes mellitus: a double-blind, placebo-controlled study. <i>Diabet Med</i> . 2010, 27(1): 113-6                                                                               | Excluded | Lack of author's response                          |

|                                                                                                                                                                                                                                                       |          |                                                                      |
|-------------------------------------------------------------------------------------------------------------------------------------------------------------------------------------------------------------------------------------------------------|----------|----------------------------------------------------------------------|
| Orea-Tejeda et al. The effect of L-arginine and citrulline on endothelial function in patients in heart failure with preserved ejection fraction. <i>Cardiol J.</i> 2010. 17(5): 464-70                                                               | Excluded | Without eligible comparator                                          |
| Siasos et al. The impact of oral L-arginine supplementation on acute smoking-induced endothelial injury and arterial performance. <i>Am J Hypertens.</i> 2009, 22(6): 586-92. 10.1038/ajh.2009.57.                                                    | Excluded | Without eligible population                                          |
| Siasos et al. Short-term treatment with L-arginine prevents the smoking-induced impairment of endothelial function and vascular elastic properties in young individuals <i>Int J Cardiol.</i> 2008, 126(3):394-9.                                     | Excluded | Without eligible population                                          |
| Schwedhelm et al. Pharmacokinetic and pharmacodynamic properties of oral L-citrulline and L-arginine: impact on nitric oxide metabolism <i>Br J Clin Pharmacol.</i> 2007, 65(1):51-9.                                                                 | Excluded | Without eligible population                                          |
| Böger et al. Asymmetric dimethylarginine determines the improvement of endothelium-dependent vasodilation by simvastatin: Effect of combination with oral L-arginine. <i>J Am Coll Cardiol.</i> 2007, 12;49(23): 2274-82.                             | Excluded | Without eligible population and comparator                           |
| Doutreleau et al. Chronic L-arginine supplementation enhances endurance exercise tolerance in heart <i>Int J Sports Med.</i> 2006, 27(7): 567-72.                                                                                                     | Excluded | Without eligible design of study                                     |
| Lucotti et al. Beneficial effects of a long-term oral L-arginine treatment added to a hypocaloric diet and exercise training program in obese, insulin-resistant type 2 diabetic patients. <i>Am J Physiol Endocrinol Metab.</i> 2006, 291(5): 906-12 | Included | Without eligible outcome                                             |
| Schulman et al. L-arginine therapy in acute myocardial infarction: the Vascular Interaction With Age in Myocardial Infarction (VINTAGE MI) randomized clinical trial. <i>JAMA.</i> 2006, 4 (1):58-64.                                                 | Excluded | Different measurement technique for analysis of outcome (blood flow) |
| Yin et al. L-arginine improves endothelial function and reduces LDL oxidation in patients with stable coronary artery disease. <i>Clin Nutr.</i> 2005: 24(6): 988-97.                                                                                 | Excluded | Without eligible comparator                                          |
| Bednarz et al. L-arginine supplementation prolongs exercise capacity in congestive heart failure. <i>Kardiol Pol.</i> 2004, 60(4): 348-53.                                                                                                            | Excluded | Full text in Polish                                                  |
| Dudek et al. L-arginine supplementation does not inhibit neointimal formation after coronary stenting in human beings: an intravascular ultrasound study. <i>Am Heart J.</i> 2004, 147(4):E12                                                         | Excluded | Without eligible comparator                                          |
| Regensteiner et al. Oral L-arginine and vitamins E and C improve endothelial function in women with type 2 diabetes. <i>Vasc Med.</i> 2003, 8(3): 169-75.                                                                                             | Excluded | Without eligible comparator                                          |
| Bode-Böger et al. Oral L-arginine improves endothelial function in healthy individuals older than 70 years <i>Vasc Med.</i> 2003, 8(2): 77-81.                                                                                                        | Excluded | Without eligible population                                          |
| Abdelhamed et al. No effect of an L-arginine-enriched medical food <i>Am Heart J.</i> 2003, 145(3):15.                                                                                                                                                | Excluded | Without eligible population                                          |

|                                                                                                                                                                                                                        |          |                                  |
|------------------------------------------------------------------------------------------------------------------------------------------------------------------------------------------------------------------------|----------|----------------------------------|
| Miller et al. Effects of an acute dose of L-arginine during coronary angiography in patients with chronic renal failure: a randomized, parallel, double-blind clinical trial. <i>Am J Nephrol.</i> 2003, 23(2):91-5.   | Excluded | Without eligible intervention    |
| Huynh et al. Oral arginine reduces systemic blood pressure in type 2 diabetes: its potential role in nitric oxide generation. <i>J Am Coll Nutr.</i> 2002, 21(5):422-7.                                                | Excluded | Without eligible comparator      |
| Sozykin et al. Effect of L-arginine on platelet aggregation, endothelial function and exercise tolerance in patients with stable angina pectoris. <i>Ter Arkh.</i> 2000, 72(8):24-7                                    | Excluded | Full text in Russian             |
| Hambrecht et al. Correction of endothelial dysfunction in chronic heart failure: additional. <i>J Am Coll Cardiol.</i> 2000, 35(3):706-13.                                                                             | Excluded | Without eligible comparator      |
| Piatti et al. Long-term oral L-arginine administration improves peripheral and hepatic insulin sensitivity in type 2 diabetic patients. <i>Diabetes Care.</i> 2001, 24(5):875-80.                                      | Excluded | Without eligible outcome         |
| Blum et al. Clinical and inflammatory effects of dietary L-arginine in patients with intractable angina pectoris. <i>Am J Cardiol.</i> 1999, 83(10):1488-90.                                                           | Excluded | Without eligible design of study |
| Bellamy et al. Syndrome X and endothelial dysfunction. <i>Cardiovasc Res.</i> 1998. 40(2):410-7.                                                                                                                       | Excluded | Without eligible population      |
| Lerman et al. Long-term L-arginine supplementation improves small-vessel coronary endothelial function in humans. <i>Circulation.</i> 1998. 97(21):2123-8.                                                             | Excluded | Without eligible population      |
| Contreras et al. Effects of aspirin or basic amino acids on collagen cross-links and complications in NIDDM. <i>Diabetes Care.</i> 1997, 20(5):832-5.                                                                  | Excluded | Without eligible outcome         |
| Ceremuzyński et al. Effect of supplemental oral L-arginine on exercise capacity in patients with stable angina pectoris. <i>American Journal of Cardiology.</i> 1997, 80(3): 331-333.                                  | Excluded | Without eligible outcome         |
| Khan et al. Oral L-arginine supplementation and cutaneous vascular responses in patients with primary Raynaud's phenomenon. <i>Arthritis and Rheumatism.</i> 1997, 40(2): 352-357.                                     | Excluded | Without eligible population      |
| Chin-Dusting et al. Dietary supplementation with L-arginine fails to restore endothelial function in forearm resistance arteries of patients with severe heart failure. <i>J Am Coll Cardiol.</i> 1996, 27(5):1207-13. | Included | Lack of author's response        |
| Clarkson et al. Oral L-arginine improves endothelium-dependent dilation in hypercholesterolemic young adults. <i>J Clin Invest.</i> 1996, 97(8):1989-94.                                                               | Excluded | Without eligible population      |
| Adams et al. Oral L-arginine inhibits platelet aggregation but does not enhance endothelium-dependent dilation in healthy young men. <i>J Am Coll Cardiol.</i> 1995, 26(4):1054-61.                                    | Excluded | Without eligible population      |
| Gater et al. Effects of arginine/lysine supplementation and resistance training on glucose tolerance. <i>J Appl Physiol.</i> 1992, 72(4):1279-84                                                                       | Excluded | Without eligible population      |
